# Supplementary material for: The Occurrence of Five Unregulated Mycotoxins Most Important for Traditional Dry-Cured Meat Products
Source: MDPI journal article supplement (doi:10.3390/toxins14070476), 2022-07-12
Supplement: s1 [file s1]

# Supplementary Materials: The Occurrence of Five Unregulated Mycotoxins Most Important for Traditional Dry-Cured Meat Products

Tina Lešić, Ana Vulić, Nada Vahčić, Bojan Šarkanj, Brigita Hengl, Ivica Kos, Tomaž Polak, Nina Kudumija and Jelka Pleadin

**Table S1.** The mycotoxins detected in traditional dry-cured meat products according to product type.

| Product group |                      | Dry-fermented sausages        |                                |                               | Dry-cured meats          |                             |                           |
|---------------|----------------------|-------------------------------|--------------------------------|-------------------------------|--------------------------|-----------------------------|---------------------------|
| Product type  |                      | Domestic<br>sausages<br>n=70  | Kulen/Kulenova<br>seka<br>n=38 | Prosciutto/Dry<br>ham<br>n=41 | Dry rack<br>n=22         | Pečenica/Ombolo<br>n=29     | Bacon/pancetta<br>n=50    |
| STC           | n% / n               | 7/5                           | 5/2                            | < LOD                         | 5/1                      | 7/2                         | 2/1                       |
|               | Mean±SD<br>(Min-max) | 0.17±0.09<br>(0.10-0.29)      | 2.30±2.31<br>(0.66-3.93)       | < LOD                         | 0.12±na                  | 0.15±0.02<br>(0.13-0.16)    | 0.49±na                   |
|               | Median               | 0.12                          | 2.30                           | < LOD                         | na                       | 0.15                        | na                        |
| OTA           | n% / n               | 19/13                         | 16/6                           | 2/1                           | 5/1                      | 3/1                         | 2/1                       |
|               | Mean±SD<br>(Min-max) | 0.82±0.78<br>(0.24-3.02)      | 0.81±0.50<br>(0.29-1.65)       | 4.81±na                       | 2.66±na                  | 0.49±0.22                   | 0.68±na                   |
|               | Median               | 0.51                          | 0.78                           | na                            | na                       | 0.49                        | na                        |
| CPA           | n% / n               | 13/9                          | 18/7                           | 15/6                          | 9/2                      | 17/5                        | 8/4                       |
|               | Mean±SD<br>(Min-max) | 54.84±144.73<br>(3.10-335.50) | 13.38±9.53<br>(5.80-27.25)     | 29.53±43.20<br>(4.20-108.50)  | 6.43±0.46<br>(6.10-6.75) | 30.24±25.55<br>(6.25-66.35) | 8.26±4.09<br>(3.20-12.80) |
|               | Median               | 6.55                          | 13.35                          | 20.90                         | 6.43                     | 27.05                       | 8.53                      |

LOD—limit of detection; na—not applicable; n%/n—percentage/number of samples above LOD.
